# Supplementary material for: The proof is in the powder: revealing structural peculiarities in the Yb3Rh4Sn13 structure type
Source: Royal Society of Chemistry journal article supplement (doi:10.1039/c7ce00419b), 2017-01-01
Supplement: c7ce00419b1.pdf [file c7ce00419b1.pdf]

# The Proof is in the Powder: Revealing Structural Peculiarities in the

## $\text{Yb}_3\text{Rh}_4\text{Sn}_{13}$ Structure Type

Iain W. H. Oswald<sup>1</sup>, B. K. Rai<sup>2</sup>, Gregory T. McCandless<sup>1</sup>, Emilia Morosan<sup>2</sup>, and Julia Y Chan<sup>1\*</sup>

<sup>1</sup>Department of Physics and Astronomy, Rice University, Houston, TX 77005 USA

<sup>2</sup>Department of Chemistry, University of Texas at Dallas, Richardson, Texas 75080, USA

\*E-mail Address: [jyc130130@utdallas.edu](mailto:jyc130130@utdallas.edu), Tel.: +1 (972) 883-3595

## Supplementary Information

**Single-Crystal X-ray Diffraction.** Single crystals of Lu<sub>3</sub>Ir<sub>4</sub>Ge<sub>13</sub> were cut to the appropriate sizes and then mounted onto separate glass fiber tips using epoxy. These were then attached onto the goniometer head of a Bruker D8 Quest equipped with Mo K $\alpha$  radiation ( $\lambda = 0.71073$  Å). Absorption correction was done using SADABS 2016/12.<sup>1</sup> Intrinsic methods was used to solve the crystal structure using Bruker SHELXT<sup>2</sup> with the refinement done in SHELXL2014/7.<sup>3</sup>

**Powder X-ray Diffraction.** Single crystals of Lu<sub>3</sub>Ir<sub>4</sub>Ge<sub>13</sub> were ground using a mortar and pestle. The powder was then placed onto a no-background holder and mounted onto a Bruker D8 Advance equipped with a LYNXEYE XE detector and Cu K $\alpha$  source ( $\lambda = 1.54060$ ). Data acquisition was collected using the Bragg-Brentano  $\theta$ - $2\theta$  mode from 10 – 90° with a step size of 0.01 and 2 seconds per count. Rietveld refinement was performed using the Bruker TOPAS software package. The single crystal model was used as a starting model for the refinement.

**Table S1. Powder X-ray Diffraction Crystallographic Parameters for Lu<sub>3</sub>Ir<sub>4</sub>Ge<sub>13</sub>**

|                                      |                           |
|--------------------------------------|---------------------------|
| Crystal System                       | Tetragonal                |
| Space Group                          | <i>I4<sub>1</sub>/amd</i> |
| <i>a</i> (Å)                         | 17.737(1)                 |
| <i>c</i> (Å)                         | 17.784(1)                 |
| <i>V</i> (Å <sup>3</sup> )           | 5594.7(6)                 |
| <i>Z</i>                             | 16                        |
| Temperature (K)                      | 298(2)                    |
| <i>R</i> <sub>wp</sub> <sup>a</sup>  | 7.85                      |
| <i>R</i> <sub>exp</sub> <sup>b</sup> | 2.88                      |
| GOF                                  | 2.73                      |

$$^a R_{wp} = (\sum_i w_i (y_i^{calc} - y_i^{obs})^2 / \sum_i w_i (y_i^{obs})^2)^{1/2}. \quad ^b R_{exp} = (N) / (\sum_i w_i (y_i^{obs})^2)^{1/2}.$$

**Table S2. Powder X-ray Diffraction Atomic Positions for Lu<sub>3</sub>Ir<sub>4</sub>Ge<sub>13</sub>**

| Atom | <i>x</i> | <i>y</i> | <i>z</i>  | <i>B</i> <sub>eq</sub> (Å <sup>2</sup> ) | Occ. (< 1) |
|------|----------|----------|-----------|------------------------------------------|------------|
| Lu1  | 0.5      | 0.374912 | 0.00026   | 0.370145                                 |            |
| Lu2  | 0.25127  | 0.49873  | 0.125     | 0.282074                                 |            |
| Lu3  | 0        | 0.37479  | 0.00139   | 0.236010                                 |            |
| Ir1  | 0.12521  | 0.375035 | 0.124977  | 0.239670                                 |            |
| Ir2  | 0.37493  | 0.37507  | 0.125     | 0.159181                                 |            |
| Ir3  | 0.12524  | 0.62476  | 0.125     | 0.290015                                 |            |
| Ge1A | 0.247944 | 0.75     | 0.000237  | 1.315819                                 | 0.921      |
| Ge1B | 0.240987 | 0.75     | -0.025501 | 1.316                                    | 0.079      |
| Ge2  | 0        | 0.332128 | 0.165995  | 0.153424                                 |            |
| Ge3  | 0.250822 | 0.329944 | 0.170009  | 0.224038                                 |            |
| Ge4  | 0.172778 | 0.416378 | 0.000427  | 0.099813                                 |            |
| Ge5  | 0        | 0.660809 | 0.172972  | 0.431529                                 |            |
| Ge6  | 0.124798 | 0.25     | 0.068336  | 1.424429                                 |            |
| Ge7  | 0.316237 | 0.385692 | 0.001707  | 1.183818                                 |            |
| Ge8  | 0.070312 | 0.500892 | 0.109221  | 1.32653                                  |            |
| Ge9  | 0.5      | 0.348662 | 0.183120  | 3.2 (4)                                  |            |

**References**

1. Krause, L.; Herbst-Irmer, R.; Sheldrick, G. M.; Stalke, D. *J. Appl. Crystallogr.*, 2015, **48**, 3-10.
2. Sheldrick, G. M. *Acta Crystallogr. Sect. A-Found. Adv.* 2015, **71**, 3-8.
3. Sheldrick, G. M. *Acta Crystallogr. C.*, 2015, **71**, 3-8.
